# Supplementary material for: Surface-charged β-glucosidase synergizes cellulase for cellulose affinity in ionic liquid pretreated biomass in situ saccharification
Source: Royal Society of Chemistry journal article supplement (doi:10.1039/d4re00466c), 2024-12-16
Supplement: d4re00466c1.pdf [file d4re00466c1.pdf]

1 Supporting information

2

3 **Surface-charged  $\beta$ -glucosidase synergizes cellulase for cellulose affinity in ionic liquid**  
4 **pretreated biomass *in situ* saccharification**

5

6 Yinghui Mu, Xin Ju, Cuiying Hu, Lishi Yan, Jiayi Tian, Su Ma\*, Liangzhi Li\*

7 *School of Chemistry and Life Science, Suzhou University of Science and Technology, Suzhou 215009,*

8 *P.R. China*

9

10 \*Corresponding author

11 Phone: +86-512-69376259

12 Fax: +86-512-69376259;

13 E-mail: liliangzhi01@163.com (Li Z); masu115@hotmail.com (Su M)

14

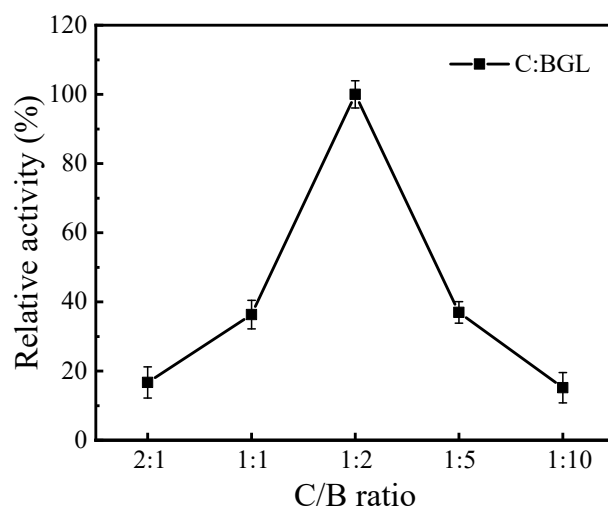

15 **Fig. S1.** The relative enzyme activity of the co-enzyme catalyzing the microcrystalline cellulose  
 16 (MCC) at cellulase/wild-type BGL (C:WT) ratios of 2:1, 1:1, 1:2, 1:5, and 1:10, respectively after  
 17 incubation for 1 h at 50°C and 200 rpm. The addition of BGL will further hydrolyze away the  
 18 accumulated cellobiose in the enzymatic pathway and attenuate the negative feedback inhibition. But  
 19 as the proportion of cellulase in the synergistic system becomes lower, the upstream ability to  
 20 gradually decompose cellulose chains into cellobiose becomes weaker. Therefore, the optimal ratio  
 21 of C:BGL in the subsequent synergistic enzymatic system was determined to be 1:2.
